# Supplementary material
Source: publisher figshare collection journal article supplement (https://diabetesjournals.figshare.com/articles/dataset/_/15782064)
Supplement: Supplementary file 1 [file 1]

## **GDS Group**

The GDS Group consists of H. Al-Hasani, V. Burkart, A.E. Buyken, G. Geerling, C. Herder, A. Icks, K. Jandeleit-Dahm, J. Kotzka, O. Kuss, E. Lammert, W. Rathmann, V. Schrauwen-Hinderling, J. Szendroedi, S. Trenkamp, D. Ziegler and M. Roden (speaker).
