# Supplementary material
Source: publisher figshare collection journal article supplement (https://diabetesjournals.figshare.com/articles/dataset/_/15782064)
Supplement: Supplementary file 2 [file 1]

## **Supplemental Material**

Supplementary Table 1 - Proportions of diabetes subgroups in different GDS analyses

Supplementary Table 2 - Blood cell counts in the diabetes subgroups

Supplementary Table 3 - Pairwise comparisons of blood cell counts among diabetes subgroups

Supplementary Table 4 - Flow cytometry data for the diabetes subgroups

Supplementary Table 5 - Pairwise comparisons of flow cytometry data among diabetes subgroups

Supplementary Figure 1 - Study population

Supplementary Figure 2 - Overview of gating strategies

Supplementary Figure 3 - Correlations of blood cell counts and immune cell frequencies with protein biomarkers measured in serum

**Supplementary Table 1 - Proportions of diabetes subgroups in different GDS analyses.**

| <b>Study population</b>                                               | <b>SAID</b> | <b>SIDD</b> | <b>SIRD</b> | <b>MOD</b> | <b>MARD</b> |
|-----------------------------------------------------------------------|-------------|-------------|-------------|------------|-------------|
| Zaharia et al., 2019: First analysis of subgroups in the GDS (n=1105) | 22%         | 3%          | 11%         | 29%        | 35%         |
| This study: Participants with blood cell counts (n=669)               | 35%         | 3%          | 5%          | 28%        | 29%         |
| This study: Participants with flow cytometry data (n=201)             | 29%         | 1%          | 6%          | 34%        | 29%         |

**Supplementary Table 2 - Blood cell counts in the diabetes subgroups**

|                               | <b>SAID (n = 232)</b> | <b>SIDD (n = 17)</b> | <b>SIRD (n = 36)</b> | <b>MOD (n = 190)</b> | <b>MARD (n = 194)</b> |
|-------------------------------|-----------------------|----------------------|----------------------|----------------------|-----------------------|
| Leukocytes/ $\mu$ L           | 5700 (4800, 6900)     | 6300 (5100, 6700)    | 7100 (6425, 8300)    | 7200 (6225, 8400)    | 6500 (5500, 7675)     |
| Lymphocytes<br>[% leukocytes] | 35.85 (31.00, 39.92)  | 36.00 (31.10, 38.80) | 30.75 (24.18, 38.10) | 32.90 (28.85, 38.40) | 34.30 (28.30, 38.30)  |
| Neutrophils<br>[% leukocytes] | 54.50 (49.35, 59.30)  | 52.80 (50.00, 59.10) | 57.90 (52.85, 64.35) | 58.35 (52.02, 62.48) | 55.35 (51.18, 61.40)  |
| NLR                           | 1.51 (1.24, 1.90)     | 1.47 (1.29, 1.90)    | 1.95 (1.42, 2.53)    | 1.78 (1.34, 2.17)    | 1.62 (1.36, 2.14)     |

Data are presented as median (25<sup>th</sup> percentile, 75<sup>th</sup> percentile).

**Supplementary Table 3 - Pairwise comparisons of blood cell counts among diabetes subgroups**

| Variable    | Contrast    | Unadjusted |        |         | Adjusted |        |        |
|-------------|-------------|------------|--------|---------|----------|--------|--------|
|             |             | Beta       | SE     | P       | Beta     | SE     | P      |
| Leukocytes  | SAID - SIDD | -0.0896    | 0.0561 | 0.5004  | 0.0354   | 0.0654 | 0.9830 |
| Leukocytes  | SAID - SIRD | -0.2389    | 0.0359 | <0.0001 | 0.0030   | 0.0590 | 1.0000 |
| Leukocytes  | SAID - MOD  | -0.2242    | 0.0242 | <0.0001 | -0.0719  | 0.0363 | 0.2752 |
| Leukocytes  | SAID - MARD | -0.1247    | 0.0245 | <0.0001 | -0.0827  | 0.0358 | 0.1427 |
| Leukocytes  | SIDD - SIRD | -0.1493    | 0.0620 | 0.1140  | -0.0323  | 0.0763 | 0.9933 |
| Leukocytes  | SIDD - MOD  | -0.1346    | 0.0560 | 0.1153  | -0.1073  | 0.0652 | 0.4686 |
| Leukocytes  | SIDD - MARD | -0.0352    | 0.0561 | 0.9708  | -0.1181  | 0.0646 | 0.3572 |
| Leukocytes  | SIRD - MOD  | 0.0147     | 0.0357 | 0.9940  | -0.0750  | 0.0456 | 0.4691 |
| Leukocytes  | SIRD - MARD | 0.1141     | 0.0359 | 0.0135  | -0.0858  | 0.0482 | 0.3872 |
| Leukocytes  | MOD - MARD  | 0.0994     | 0.0242 | 0.0004  | -0.0108  | 0.0317 | 0.9971 |
| Lymphocytes | SAID - SIDD | -0.0132    | 0.0495 | 0.9989  | -0.0926  | 0.0533 | 0.4122 |
| Lymphocytes | SAID - SIRD | 0.1581     | 0.0511 | 0.0175  | 0.0494   | 0.0673 | 0.9484 |
| Lymphocytes | SAID - MOD  | 0.0657     | 0.0218 | 0.0226  | 0.0037   | 0.0339 | 1.0000 |
| Lymphocytes | SAID - MARD | 0.0738     | 0.0236 | 0.0160  | 0.0251   | 0.0341 | 0.9479 |
| Lymphocytes | SIDD - SIRD | 0.1712     | 0.0678 | 0.0862  | 0.1420   | 0.0753 | 0.3258 |
| Lymphocytes | SIDD - MOD  | 0.0788     | 0.0496 | 0.5047  | 0.0963   | 0.0536 | 0.3761 |
| Lymphocytes | SIDD - MARD | 0.0869     | 0.0504 | 0.4197  | 0.1177   | 0.0535 | 0.1809 |
| Lymphocytes | SIRD - MOD  | -0.0924    | 0.0512 | 0.3717  | -0.0457  | 0.0572 | 0.9312 |
| Lymphocytes | SIRD - MARD | -0.0843    | 0.0520 | 0.4843  | -0.0243  | 0.0602 | 0.9944 |
| Lymphocytes | MOD - MARD  | 0.0081     | 0.0238 | 0.9971  | 0.0214   | 0.0315 | 0.9612 |
| Neutrophils | SAID - SIDD | 0.0114     | 0.0386 | 0.9983  | 0.0465   | 0.0408 | 0.7857 |
| Neutrophils | SAID - SIRD | -0.0730    | 0.0269 | 0.0521  | -0.0151  | 0.0388 | 0.9951 |
| Neutrophils | SAID - MOD  | -0.0564    | 0.0141 | 0.0007  | -0.0136  | 0.0218 | 0.9717 |
| Neutrophils | SAID - MARD | -0.0362    | 0.0141 | 0.0774  | -0.0127  | 0.0213 | 0.9754 |
| Neutrophils | SIDD - SIRD | -0.0845    | 0.0449 | 0.3279  | -0.0616  | 0.0497 | 0.7279 |
| Neutrophils | SIDD - MOD  | -0.0678    | 0.0386 | 0.4009  | -0.0600  | 0.0408 | 0.5811 |
| Neutrophils | SIDD - MARD | -0.0477    | 0.0386 | 0.7314  | -0.0592  | 0.0403 | 0.5837 |
| Neutrophils | SIRD - MOD  | 0.0167     | 0.0269 | 0.9719  | 0.0016   | 0.0316 | 1.0000 |
| Neutrophils | SIRD - MARD | 0.0368     | 0.0269 | 0.6470  | 0.0024   | 0.0330 | 1.0000 |
| Neutrophils | MOD - MARD  | 0.0201     | 0.0141 | 0.6116  | 0.0008   | 0.0192 | 1.0000 |
| NLR         | SAID - SIDD | 0.0246     | 0.0857 | 0.9985  | 0.1388   | 0.0912 | 0.5483 |
| NLR         | SAID - SIRD | -0.2311    | 0.0763 | 0.0214  | -0.0660  | 0.1035 | 0.9690 |
| NLR         | SAID - MOD  | -0.1220    | 0.0350 | 0.0048  | -0.0171  | 0.0543 | 0.9979 |
| NLR         | SAID - MARD | -0.1100    | 0.0366 | 0.0228  | -0.0384  | 0.0538 | 0.9532 |
| NLR         | SIDD - SIRD | -0.2557    | 0.1093 | 0.1342  | -0.2047  | 0.1211 | 0.4408 |
| NLR         | SIDD - MOD  | -0.1466    | 0.0858 | 0.4291  | -0.1559  | 0.0914 | 0.4316 |
| NLR         | SIDD - MARD | -0.1346    | 0.0864 | 0.5256  | -0.1772  | 0.0907 | 0.2906 |
| NLR         | SIRD - MOD  | 0.1091     | 0.0764 | 0.6107  | 0.0489   | 0.0868 | 0.9803 |
| NLR         | SIRD - MARD | 0.1211     | 0.0772 | 0.5176  | 0.0275   | 0.0910 | 0.9982 |
| NLR         | MOD - MARD  | 0.0120     | 0.0369 | 0.9975  | -0.0213  | 0.0493 | 0.9927 |

Effect estimates (ln-scale) and corresponding *P* values of pairwise comparisons (unadjusted or adjusted for clinical variables as described in the Methods section) of blood cell counts (leukocytes=leukocytes/ $\mu$ L, lymphocytes=lymphocytes [% of leukocytes], neutrophils=neutrophils [%

of leukocytes]) or neutrophil-lymphocyte-ratio (NLR). Positive/negative effect estimates result from higher/lower cell numbers and frequencies in the diabetes subgroups named first in the respective comparison.

**Supplementary Table 4 - Flow cytometry data for the diabetes subgroups**

|                                                                               | <b>SAID (n = 59)</b> | <b>n<sub>m</sub></b> | <b>SIDD (n = 3)</b>  | <b>n<sub>m</sub></b> | <b>SIRD (n = 13)</b> | <b>n<sub>m</sub></b> | <b>MOD (n = 68)</b>  | <b>n<sub>m</sub></b> | <b>MARD (n = 58)</b> | <b>n<sub>m</sub></b> |
|-------------------------------------------------------------------------------|----------------------|----------------------|----------------------|----------------------|----------------------|----------------------|----------------------|----------------------|----------------------|----------------------|
| Leukocytes/ $\mu$ L                                                           | 6000 (5050, 6750)    | -                    | 5700 (5100, 6200)    | -                    | 7200 (6900, 9600)    | -                    | 7200 (6275, 8400)    | -                    | 6350 (5525, 7750)    | -                    |
| Lymphocytes [% leukocytes]                                                    | 38.30 (32.00, 41.40) | 10                   | 37.60 (36.30, 38.90) | 1                    | 27.20 (24.58, 35.77) | 5                    | 32.45 (28.90, 37.75) | 10                   | 35.00 (27.77, 38.68) | 8                    |
| Neutrophils [% leukocytes]                                                    | 53.10 (49.35, 57.42) | 11                   | 55.00 (53.50, 56.50) | 1                    | 57.25 (53.90, 60.62) | 5                    | 58.40 (51.60, 62.70) | 11                   | 54.80 (51.50, 60.15) | 11                   |
| NLR                                                                           | 1.39 (1.24, 1.81)    | 11                   | 1.48 (1.38, 1.57)    | 1                    | 2.16 (1.47, 2.53)    | 5                    | 1.85 (1.37, 2.17)    | 11                   | 1.57 (1.34, 2.02)    | 11                   |
| CD4 <sup>+</sup> T cells [% of CD3 <sup>+</sup> lymphocytes]                  | 58.00 (52.65, 66.15) | -                    | 59.30 (56.95, 65.70) | -                    | 68.40 (64.00, 76.00) | -                    | 60.00 (55.45, 68.17) | -                    | 63.80 (54.80, 72.10) | 1                    |
| CD8 <sup>+</sup> T cells [% of CD3 <sup>+</sup> lymphocytes]                  | 35.70 (29.00, 41.80) | -                    | 35.40 (29.75, 36.20) | -                    | 22.20 (19.80, 31.30) | -                    | 33.40 (27.00, 38.97) | -                    | 31.30 (24.00, 39.10) | 1                    |
| CD4 <sup>+</sup> CD8 <sup>+</sup> T cells [% of CD3 <sup>+</sup> lymphocytes] | 0.88 (0.63, 1.42)    | -                    | 1.16 (1.09, 1.25)    | -                    | 1.13 (0.72, 1.72)    | -                    | 1.10 (0.77, 2.04)    | -                    | 1.14 (0.62, 2.14)    | 1                    |
| CD4 <sup>+</sup> /CD8 <sup>+</sup> T cell ratio                               | 1.65 (1.28, 2.28)    | -                    | 1.68 (1.58, 2.33)    | -                    | 3.08 (2.06, 3.82)    | -                    | 1.84 (1.38, 2.58)    | -                    | 2.04 (1.42, 2.89)    | 1                    |
| T <sub>reg</sub> [% of CD4 <sup>+</sup> lymphocytes]                          | 5.55 (4.68, 6.91)    | 2                    | 4.21 (3.96, 6.47)    | -                    | 5.27 (4.33, 6.28)    | 1                    | 5.87 (4.63, 7.26)    | -                    | 6.37 (4.85, 7.84)    | -                    |
| CCR4 <sup>+</sup> T <sub>reg</sub> [% of T <sub>reg</sub> ]                   | 63.90 (55.00, 74.50) | 2                    | 69.10 (48.40, 75.05) | -                    | 74.80 (72.15, 78.55) | 2                    | 67.20 (62.80, 77.30) | 3                    | 77.10 (68.70, 83.00) | 1                    |
| CD161 <sup>+</sup> T <sub>reg</sub> [% of T <sub>reg</sub> ]                  | 12.10 (9.23, 15.20)  | 2                    | 17.20 (15.90, 23.80) | -                    | 11.00 (9.81, 12.95)  | 1                    | 13.20 (10.20, 16.70) | 1                    | 14.00 (10.93, 16.50) | -                    |
| B cells [% of lymphocytes]                                                    | 12.50 (10.16, 15.05) | -                    | 13.70 (13.60, 14.55) | -                    | 15.20 (11.50, 17.20) | -                    | 12.95 (10.67, 16.20) | -                    | 11.50 (9.19, 14.43)  | -                    |
| NK cells [% of lymphocytes]                                                   | 9.67 (6.09, 16.25)   | -                    | 7.05 (4.91, 8.46)    | -                    | 11.10 (7.76, 12.30)  | -                    | 8.71 (5.56, 12.77)   | -                    | 11.35 (7.68, 15.52)  | -                    |
| NK T cells [% of lymphocytes]                                                 | 4.30 (2.42, 6.14)    | -                    | 6.35 (3.99, 6.54)    | -                    | 3.04 (1.42, 4.82)    | -                    | 4.06 (2.15, 8.02)    | -                    | 4.47 (2.55, 7.84)    | -                    |

Data are presented as median (25<sup>th</sup> percentile, 75<sup>th</sup> percentile), n<sub>m</sub>= number of missings.

**Supplementary Table 5 - Pairwise comparisons of flow cytometry data among diabetes subgroups**

|                                           |             | Unadjusted |        |        | Adjusted |        |        |
|-------------------------------------------|-------------|------------|--------|--------|----------|--------|--------|
| Variable                                  | Contrast    | Beta       | SE     | P      | Beta     | SE     | P      |
| B cells                                   | SAID - SIDD | -0.1447    | 0.0561 | 0.0782 | -0.2273  | 0.0795 | 0.0377 |
| B cells                                   | SAID - SIRD | -0.1721    | 0.1104 | 0.5260 | -0.1405  | 0.1666 | 0.9167 |
| B cells                                   | SAID - MOD  | -0.0387    | 0.0569 | 0.9606 | -0.0475  | 0.0859 | 0.9815 |
| B cells                                   | SAID - MARD | 0.0434     | 0.0597 | 0.9500 | -0.0408  | 0.0993 | 0.9940 |
| B cells                                   | SIDD - SIRD | -0.0273    | 0.1119 | 0.9992 | 0.0868   | 0.1659 | 0.9849 |
| B cells                                   | SIDD - MOD  | 0.1061     | 0.0597 | 0.3899 | 0.1798   | 0.0888 | 0.2583 |
| B cells                                   | SIDD - MARD | 0.1881     | 0.0624 | 0.0240 | 0.1865   | 0.0932 | 0.2690 |
| B cells                                   | SIRD - MOD  | 0.1334     | 0.1123 | 0.7583 | 0.0929   | 0.1374 | 0.9613 |
| B cells                                   | SIRD - MARD | 0.2155     | 0.1137 | 0.3237 | 0.0997   | 0.1359 | 0.9484 |
| B cells                                   | MOD - MARD  | 0.0821     | 0.0631 | 0.6908 | 0.0067   | 0.0865 | 1.0000 |
| NK cells                                  | SAID - SIDD | 0.4941     | 0.3868 | 0.7053 | 0.5502   | 0.4261 | 0.6970 |
| NK cells                                  | SAID - SIRD | -0.0577    | 0.1039 | 0.9811 | 0.3440   | 0.2199 | 0.5223 |
| NK cells                                  | SAID - MOD  | 0.0979     | 0.0962 | 0.8469 | 0.2166   | 0.1443 | 0.5627 |
| NK cells                                  | SAID - MARD | -0.1451    | 0.0978 | 0.5749 | 0.2160   | 0.1642 | 0.6822 |
| NK cells                                  | SIDD - SIRD | -0.5518    | 0.3879 | 0.6140 | -0.2062  | 0.4519 | 0.9910 |
| NK cells                                  | SIDD - MOD  | -0.3962    | 0.3860 | 0.8429 | -0.3336  | 0.4242 | 0.9343 |
| NK cells                                  | SIDD - MARD | -0.6392    | 0.3864 | 0.4648 | -0.3343  | 0.4262 | 0.9349 |
| NK cells                                  | SIRD - MOD  | 0.1557     | 0.1008 | 0.5354 | -0.1274  | 0.1558 | 0.9249 |
| NK cells                                  | SIRD - MARD | -0.0874    | 0.1024 | 0.9133 | -0.1280  | 0.1425 | 0.8970 |
| NK cells                                  | MOD - MARD  | -0.2430    | 0.0946 | 0.0802 | -0.0007  | 0.1276 | 1.0000 |
| NKT cells                                 | SAID - SIDD | -0.0671    | 0.4716 | 0.9999 | -0.1242  | 0.5024 | 0.9992 |
| NKT cells                                 | SAID - SIRD | 0.4384     | 0.2445 | 0.3804 | 0.3876   | 0.4144 | 0.8828 |
| NKT cells                                 | SAID - MOD  | -0.0385    | 0.1406 | 0.9988 | -0.1738  | 0.2193 | 0.9325 |
| NKT cells                                 | SAID - MARD | -0.1821    | 0.1534 | 0.7588 | -0.1279  | 0.2636 | 0.9886 |
| NKT cells                                 | SIDD - SIRD | 0.5055     | 0.5122 | 0.8610 | 0.5118   | 0.6099 | 0.9180 |
| NKT cells                                 | SIDD - MOD  | 0.0286     | 0.4716 | 1.0000 | -0.0496  | 0.5065 | 1.0000 |
| NKT cells                                 | SIDD - MARD | -0.1150    | 0.4755 | 0.9992 | -0.0037  | 0.5138 | 1.0000 |
| NKT cells                                 | SIRD - MOD  | -0.4769    | 0.2444 | 0.2942 | -0.5614  | 0.3288 | 0.4320 |
| NKT cells                                 | SIRD - MARD | -0.6205    | 0.2520 | 0.1037 | -0.5155  | 0.3237 | 0.5042 |
| NKT cells                                 | MOD - MARD  | -0.1436    | 0.1533 | 0.8824 | 0.0459   | 0.2159 | 0.9995 |
| CD4 <sup>+</sup> CD8 <sup>+</sup> T cells | SAID - SIDD | -0.2141    | 0.1090 | 0.2877 | -0.1489  | 0.1649 | 0.8956 |
| CD4 <sup>+</sup> CD8 <sup>+</sup> T cells | SAID - SIRD | -0.2626    | 0.2530 | 0.8374 | 0.3974   | 0.3813 | 0.8354 |
| CD4 <sup>+</sup> CD8 <sup>+</sup> T cells | SAID - MOD  | -0.3471    | 0.1294 | 0.0604 | -0.0415  | 0.1897 | 0.9995 |
| CD4 <sup>+</sup> CD8 <sup>+</sup> T cells | SAID - MARD | -0.2938    | 0.1521 | 0.3040 | 0.1061   | 0.2322 | 0.9910 |
| CD4 <sup>+</sup> CD8 <sup>+</sup> T cells | SIDD - SIRD | -0.0485    | 0.2537 | 0.9997 | 0.5463   | 0.3800 | 0.6043 |
| CD4 <sup>+</sup> CD8 <sup>+</sup> T cells | SIDD - MOD  | -0.1330    | 0.1309 | 0.8476 | 0.1074   | 0.1971 | 0.9825 |
| CD4 <sup>+</sup> CD8 <sup>+</sup> T cells | SIDD - MARD | -0.0797    | 0.1533 | 0.9853 | 0.2550   | 0.2213 | 0.7786 |
| CD4 <sup>+</sup> CD8 <sup>+</sup> T cells | SIRD - MOD  | -0.0845    | 0.2631 | 0.9977 | -0.4389  | 0.3211 | 0.6497 |
| CD4 <sup>+</sup> CD8 <sup>+</sup> T cells | SIRD - MARD | -0.0313    | 0.2750 | 1.0000 | -0.2913  | 0.3233 | 0.8961 |
| CD4 <sup>+</sup> CD8 <sup>+</sup> T cells | MOD - MARD  | 0.0533     | 0.1684 | 0.9978 | 0.1476   | 0.2126 | 0.9576 |
| CD8 <sup>+</sup> T cells                  | SAID - SIDD | 0.0876     | 0.1402 | 0.9710 | 0.0649   | 0.1334 | 0.9885 |
| CD8 <sup>+</sup> T cells                  | SAID - SIRD | 0.3601     | 0.0834 | 0.0002 | 0.2728   | 0.1467 | 0.3430 |
| CD8 <sup>+</sup> T cells                  | SAID - MOD  | 0.0896     | 0.0491 | 0.3617 | 0.0298   | 0.0770 | 0.9952 |

|                                                 |             |         |        |         |         |        |        |
|-------------------------------------------------|-------------|---------|--------|---------|---------|--------|--------|
| CD8 <sup>+</sup> T cells                        | SAID - MARD | 0.1289  | 0.0576 | 0.1704  | 0.0594  | 0.0967 | 0.9726 |
| CD8 <sup>+</sup> T cells                        | SIDD - SIRD | 0.2726  | 0.1561 | 0.4084  | 0.2079  | 0.1814 | 0.7818 |
| CD8 <sup>+</sup> T cells                        | SIDD - MOD  | 0.0021  | 0.1408 | 1.0000  | -0.0351 | 0.1357 | 0.9990 |
| CD8 <sup>+</sup> T cells                        | SIDD - MARD | 0.0413  | 0.1440 | 0.9985  | -0.0054 | 0.1417 | 1.0000 |
| CD8 <sup>+</sup> T cells                        | SIRD - MOD  | -0.2705 | 0.0845 | 0.0137  | -0.2430 | 0.1157 | 0.2245 |
| CD8 <sup>+</sup> T cells                        | SIRD - MARD | -0.2313 | 0.0897 | 0.0784  | -0.2134 | 0.1157 | 0.3512 |
| CD8 <sup>+</sup> T cells                        | MOD - MARD  | 0.0392  | 0.0592 | 0.9639  | 0.0297  | 0.0801 | 0.9960 |
| CD4 <sup>+</sup> T cells                        | SAID - SIDD | -0.0530 | 0.0851 | 0.9713  | -0.0532 | 0.0828 | 0.9678 |
| CD4 <sup>+</sup> T cells                        | SAID - SIRD | -0.1760 | 0.0371 | <0.0001 | -0.1589 | 0.0803 | 0.2798 |
| CD4 <sup>+</sup> T cells                        | SAID - MOD  | -0.0449 | 0.0293 | 0.5416  | -0.0318 | 0.0461 | 0.9587 |
| CD4 <sup>+</sup> T cells                        | SAID - MARD | -0.0421 | 0.0381 | 0.8036  | -0.0221 | 0.0600 | 0.9960 |
| CD4 <sup>+</sup> T cells                        | SIDD - SIRD | -0.1230 | 0.0880 | 0.6295  | -0.1057 | 0.1041 | 0.8478 |
| CD4 <sup>+</sup> T cells                        | SIDD - MOD  | 0.0081  | 0.0849 | 1.0000  | 0.0214  | 0.0833 | 0.9990 |
| CD4 <sup>+</sup> T cells                        | SIDD - MARD | 0.0109  | 0.0884 | 0.9999  | 0.0311  | 0.0884 | 0.9967 |
| CD4 <sup>+</sup> T cells                        | SIRD - MOD  | 0.1311  | 0.0368 | 0.0043  | 0.1272  | 0.0592 | 0.2039 |
| CD4 <sup>+</sup> T cells                        | SIRD - MARD | 0.1338  | 0.0442 | 0.0232  | 0.1368  | 0.0606 | 0.1633 |
| CD4 <sup>+</sup> T cells                        | MOD - MARD  | 0.0028  | 0.0378 | 1.0000  | 0.0097  | 0.0494 | 0.9997 |
| CD4 <sup>+</sup> /CD8 <sup>+</sup> T cell ratio | SAID - SIDD | -0.1405 | 0.2241 | 0.9706  | -0.1193 | 0.2167 | 0.9818 |
| CD4 <sup>+</sup> /CD8 <sup>+</sup> T cell ratio | SAID - SIRD | -0.5361 | 0.1190 | 0.0001  | -0.4552 | 0.2249 | 0.2586 |
| CD4 <sup>+</sup> /CD8 <sup>+</sup> T cell ratio | SAID - MOD  | -0.1244 | 0.0782 | 0.5054  | -0.0589 | 0.1227 | 0.9891 |
| CD4 <sup>+</sup> /CD8 <sup>+</sup> T cell ratio | SAID - MARD | -0.1710 | 0.0913 | 0.3357  | -0.1050 | 0.1534 | 0.9597 |
| CD4 <sup>+</sup> /CD8 <sup>+</sup> T cell ratio | SIDD - SIRD | -0.3956 | 0.2420 | 0.4775  | -0.3360 | 0.2848 | 0.7630 |
| CD4 <sup>+</sup> /CD8 <sup>+</sup> T cell ratio | SIDD - MOD  | 0.0161  | 0.2248 | 1.0000  | 0.0603  | 0.2200 | 0.9988 |
| CD4 <sup>+</sup> /CD8 <sup>+</sup> T cell ratio | SIDD - MARD | -0.0305 | 0.2297 | 0.9999  | 0.0143  | 0.2291 | 1.0000 |
| CD4 <sup>+</sup> /CD8 <sup>+</sup> T cell ratio | SIRD - MOD  | 0.4117  | 0.1203 | 0.0068  | 0.3963  | 0.1736 | 0.1550 |
| CD4 <sup>+</sup> /CD8 <sup>+</sup> T cell ratio | SIRD - MARD | 0.3651  | 0.1292 | 0.0413  | 0.3503  | 0.1727 | 0.2569 |
| CD4 <sup>+</sup> /CD8 <sup>+</sup> T cell ratio | MOD - MARD  | -0.0466 | 0.0931 | 0.9872  | -0.0460 | 0.1267 | 0.9963 |
| T <sub>regs</sub>                               | SAID - SIDD | 0.1024  | 0.2700 | 0.9956  | 0.2448  | 0.2489 | 0.8625 |
| T <sub>regs</sub>                               | SAID - SIRD | 0.0919  | 0.0767 | 0.7526  | 0.2911  | 0.1427 | 0.2517 |
| T <sub>regs</sub>                               | SAID - MOD  | -0.0078 | 0.0577 | 0.9999  | 0.1545  | 0.0857 | 0.3757 |
| T <sub>regs</sub>                               | SAID - MARD | -0.0636 | 0.0597 | 0.8240  | 0.0917  | 0.1020 | 0.8970 |
| T <sub>regs</sub>                               | SIDD - SIRD | -0.0105 | 0.2754 | 1.0000  | 0.0463  | 0.2726 | 0.9998 |
| T <sub>regs</sub>                               | SIDD - MOD  | -0.1102 | 0.2707 | 0.9942  | -0.0903 | 0.2503 | 0.9964 |
| T <sub>regs</sub>                               | SIDD - MARD | -0.1660 | 0.2711 | 0.9730  | -0.1530 | 0.2527 | 0.9741 |
| T <sub>regs</sub>                               | SIRD - MOD  | -0.0997 | 0.0791 | 0.7156  | -0.1366 | 0.1062 | 0.7006 |
| T <sub>regs</sub>                               | SIRD - MARD | -0.1555 | 0.0805 | 0.3049  | -0.1994 | 0.1008 | 0.2812 |
| T <sub>regs</sub>                               | MOD - MARD  | -0.0558 | 0.0627 | 0.9003  | -0.0628 | 0.0847 | 0.9466 |
| CCR4 <sup>+</sup> T <sub>regs</sub>             | SAID - SIDD | 0.1430  | 0.3363 | 0.9931  | 0.1150  | 0.3507 | 0.9975 |
| CCR4 <sup>+</sup> T <sub>regs</sub>             | SAID - SIRD | -0.1941 | 0.0414 | <0.0001 | -0.0652 | 0.0814 | 0.9299 |
| CCR4 <sup>+</sup> T <sub>regs</sub>             | SAID - MOD  | -0.0881 | 0.0410 | 0.2038  | -0.0918 | 0.0556 | 0.4669 |
| CCR4 <sup>+</sup> T <sub>regs</sub>             | SAID - MARD | -0.1654 | 0.0487 | 0.0074  | -0.0855 | 0.0673 | 0.7098 |
| CCR4 <sup>+</sup> T <sub>regs</sub>             | SIDD - SIRD | -0.3370 | 0.3350 | 0.8523  | -0.1802 | 0.3536 | 0.9863 |
| CCR4 <sup>+</sup> T <sub>regs</sub>             | SIDD - MOD  | -0.2310 | 0.3349 | 0.9585  | -0.2068 | 0.3491 | 0.9761 |
| CCR4 <sup>+</sup> T <sub>regs</sub>             | SIDD - MARD | -0.3083 | 0.3360 | 0.8898  | -0.2005 | 0.3504 | 0.9790 |
| CCR4 <sup>+</sup> T <sub>regs</sub>             | SIRD - MOD  | 0.1060  | 0.0283 | 0.0022  | -0.0265 | 0.0521 | 0.9863 |
| CCR4 <sup>+</sup> T <sub>regs</sub>             | SIRD - MARD | 0.0287  | 0.0386 | 0.9462  | -0.0203 | 0.0528 | 0.9954 |
| CCR4 <sup>+</sup> T <sub>regs</sub>             | MOD - MARD  | -0.0773 | 0.0381 | 0.2574  | 0.0063  | 0.0470 | 0.9999 |



|                                      |             |         |        |        |         |        |        |
|--------------------------------------|-------------|---------|--------|--------|---------|--------|--------|
| CD161 <sup>+</sup> T <sub>regs</sub> | SAID - SIDD | -0.5472 | 0.2327 | 0.1337 | -0.5674 | 0.2247 | 0.0895 |
| CD161 <sup>+</sup> T <sub>regs</sub> | SAID - SIRD | -0.0159 | 0.1080 | 0.9999 | 0.3790  | 0.1905 | 0.2752 |
| CD161 <sup>+</sup> T <sub>regs</sub> | SAID - MOD  | -0.1141 | 0.0839 | 0.6543 | -0.0232 | 0.1243 | 0.9997 |
| CD161 <sup>+</sup> T <sub>regs</sub> | SAID - MARD | -0.1460 | 0.0811 | 0.3761 | 0.0561  | 0.1369 | 0.9940 |
| CD161 <sup>+</sup> T <sub>regs</sub> | SIDD - SIRD | 0.5313  | 0.2373 | 0.1699 | 0.9464  | 0.2557 | 0.0026 |
| CD161 <sup>+</sup> T <sub>regs</sub> | SIDD - MOD  | 0.4331  | 0.2273 | 0.3181 | 0.5442  | 0.2145 | 0.0870 |
| CD161 <sup>+</sup> T <sub>regs</sub> | SIDD - MARD | 0.4012  | 0.2263 | 0.3925 | 0.6236  | 0.2149 | 0.0336 |
| CD161 <sup>+</sup> T <sub>regs</sub> | SIRD - MOD  | -0.0982 | 0.0958 | 0.8434 | -0.4022 | 0.1346 | 0.0262 |
| CD161 <sup>+</sup> T <sub>regs</sub> | SIRD - MARD | -0.1302 | 0.0933 | 0.6317 | -0.3229 | 0.1298 | 0.0979 |
| CD161 <sup>+</sup> T <sub>regs</sub> | MOD - MARD  | -0.0320 | 0.0639 | 0.9873 | 0.0793  | 0.0941 | 0.9167 |

Effect estimates (ln-scale) and corresponding *P* values of pairwise (unadjusted or adjusted for clustering variables as described in the Methods section) comparisons of B cells, NKT cells, NK cells (all [% of lymphocytes]), CD4<sup>+</sup>CD8<sup>+</sup> T cells, CD8<sup>+</sup> T cells, CD4<sup>+</sup> T cells (all [% of CD3<sup>+</sup> lymphocytes]), CD4<sup>+</sup>/CD8<sup>+</sup> T cell ratio, T<sub>regs</sub> [% of CD4<sup>+</sup> T cells], CCR4<sup>+</sup> T<sub>regs</sub> and CD161<sup>+</sup> T<sub>regs</sub> [% of total T<sub>regs</sub>]. Positive/negative effect estimates result from higher/lower cell numbers and frequencies in the diabetes subgroups named first in the respective comparison.

**A**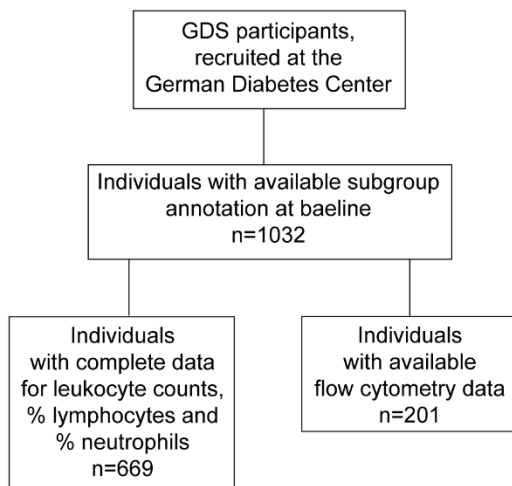**B**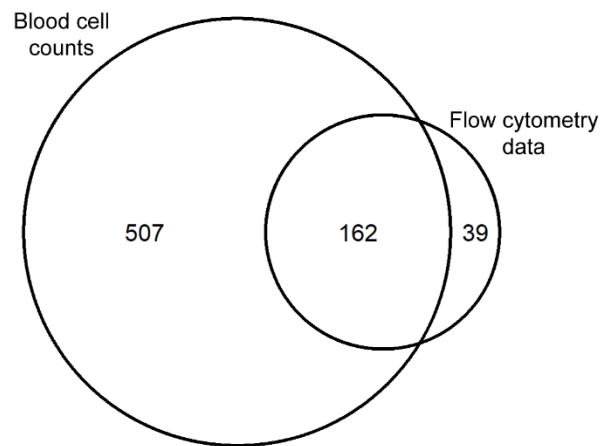

**Supplementary Figure 1** - Study population. (A) Overview of all included GDS participants. (B) Overlap of subpopulation with complete data for blood cell counts with population with available flow cytometry data.

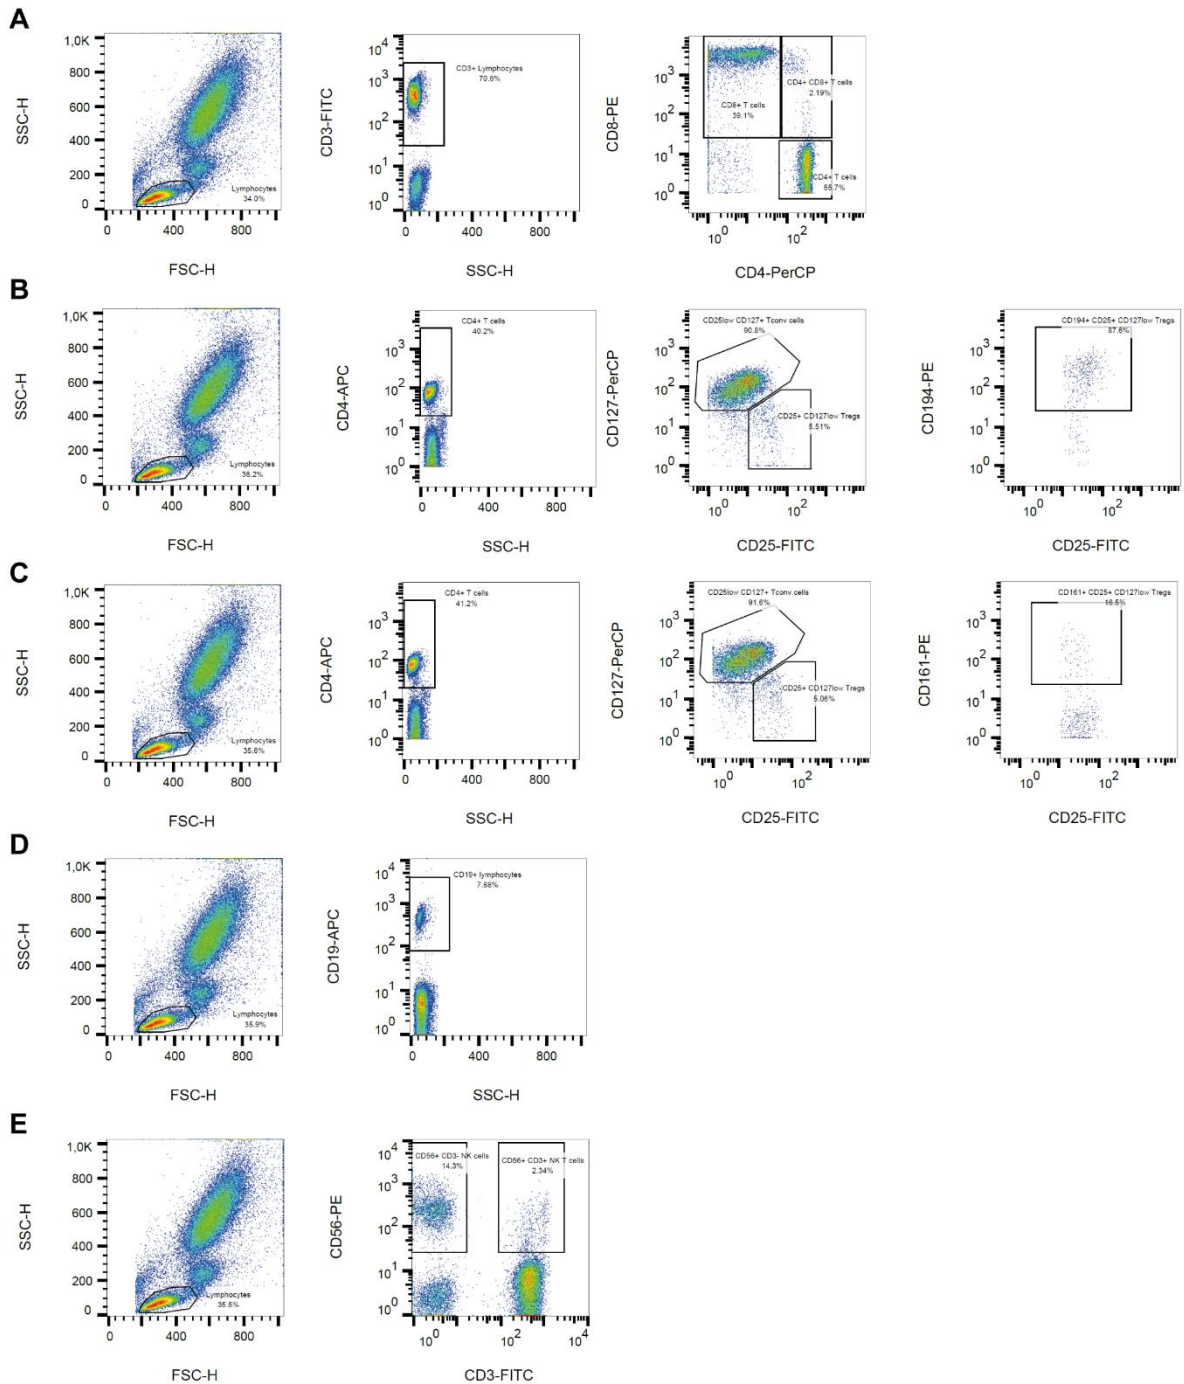

**Supplementary Figure 2 - Overview of gating strategies.** A-E: Gating strategies for T cells (A), CD194 (=CCR4)<sup>+</sup> regulatory T cells (B), CD161<sup>+</sup> regulatory T cells (C), B cells (D), NK and NK T cells (E).

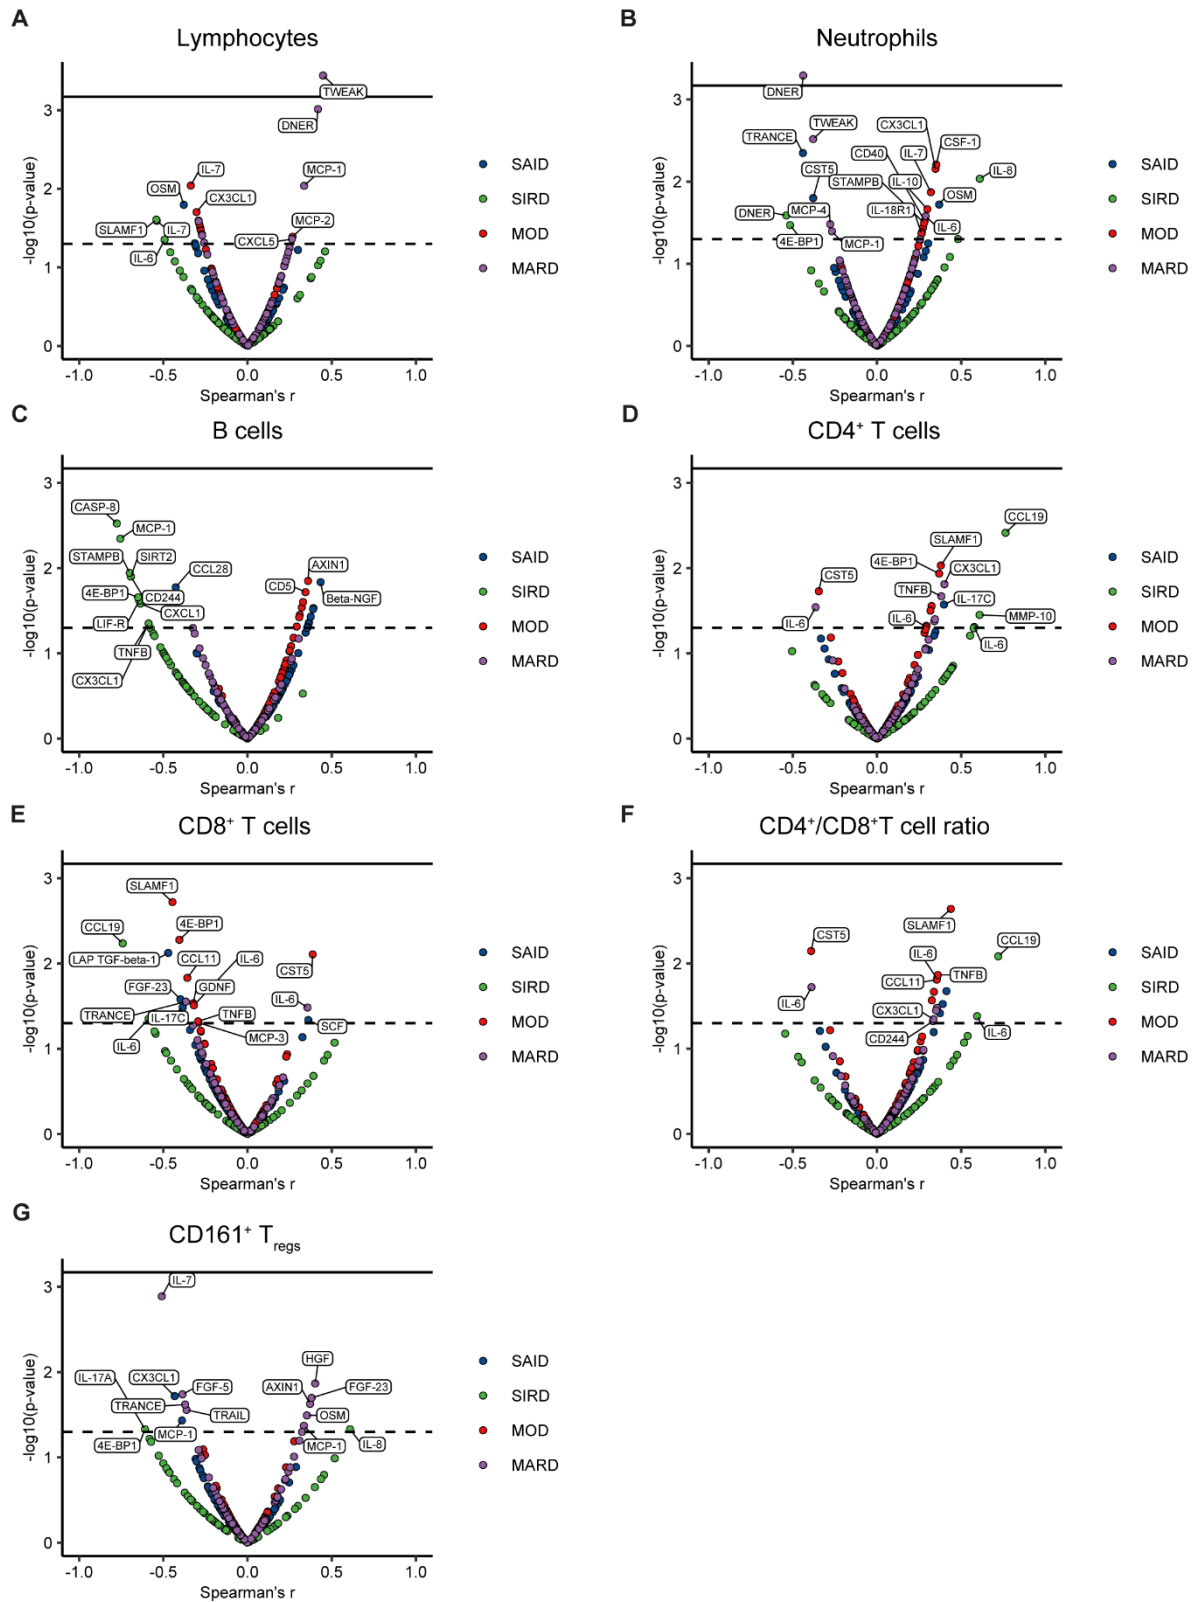

**Supplementary Figure 3 - Correlations of blood cell counts and immune cell frequencies with protein biomarkers measured in serum.** A-G: Correlations between lymphocytes (A), neutrophils (B), B cells (C), CD4<sup>+</sup> T cells (D), CD8<sup>+</sup> T cells (E), CD4<sup>+</sup>/CD8<sup>+</sup> T cell ratio (F) and CD161<sup>+</sup> regulatory T cells (G) with 74 proteins measured in serum are displayed as volcano plots, where each dot represents Spearman's  $r$  and corresponding  $P$  value for the correlation of one protein with the indicated celltype frequency in the corresponding graph. Horizontal lines represent  $P$  value thresholds (dotted line  $P=0.05$ ; solid line:  $P=0.0007$ , Bonferroni correction for multiple testing of 74 proteins). Proteins with  $P>0.05$  are labeled by name; the number of labels was limited to enable readability.
